# Supplementary material
Source: PubMed Central journal article supplement (PMC3574905)
Supplement: 1213875110_pnas.201213875SI.pdf [file 1213875110_pnas.201213875SI.pdf]

# Supporting Information

Tipple et al. 10.1073/pnas.1213875110

**Table S1. Environmental and plant-water hydrogen isotope values**

| Sample date | Day number | Stream water $\delta^2\text{H}$ (‰) | SD | Atmospheric water vapor $\delta^2\text{H}$ (‰) | SD | Stem water $\delta^2\text{H}$ (‰) | SD | Leaf water $\delta^2\text{H}$ (‰) | SD |
|-------------|------------|-------------------------------------|----|------------------------------------------------|----|-----------------------------------|----|-----------------------------------|----|
| 4/22/10     | 112        | -132                                | 0  |                                                |    | -123                              | 0  |                                   |    |
| 5/3/10      | 123        | -131                                | 1  | -173                                           | 4  | -118                              | 0  | -93                               | 0  |
| 5/12/10     | 132        | -132                                | 0  | -233                                           | 1  | -110                              | 1  | -100                              | 1  |
| 5/17/10     | 137        | -131                                | 1  | -186                                           | 0  | -132                              | 0  | -100                              | 0  |
| 5/21/10     | 141        | -130                                | 0  | -158                                           | 0  | -121                              | 0  | -85                               | 0  |
| 5/26/10     | 146        | -130                                | 0  | -160                                           | 0  | -120                              | 1  | -93                               | 1  |
| 6/2/10      | 153        | -129                                | 1  | -188                                           | 0  | -127                              | 0  | -116                              | 1  |
| 6/10/10     | 161        | -128                                | 0  | -169                                           | 0  | -136                              | 0  | -96                               | 0  |
| 6/16/10     | 167        | -129                                | 0  | -169                                           | 1  | -133                              | 1  | -115                              | 1  |
| 6/28/10     | 179        | -130                                | 1  | -186                                           | 1  | -134                              | 0  | -112                              | 1  |
| 7/14/10     | 195        | -130                                | 1  | -168                                           | 1  | -134                              | 0  | -76                               | 0  |
| 8/4/10      | 216        | -130                                | 0  | -139                                           | 0  | -131                              | 0  | -68                               | 1  |
| 8/27/10     | 239        | -129                                | 1  | -132                                           | 0  | -133                              | 1  | -61                               | 1  |
| 9/7/10      | 250        | -130                                | 0  | -169                                           | 1  | -136                              | 1  | -69                               | 1  |
| 10/1/10     | 274        | -127                                | 0  | -176                                           | 1  | -145                              | 1  | -61                               | 0  |

**Table S2. Compound-specific hydrogen isotope values and compound distributions**

| Sample date | Day number | $n\text{-C}_{27}$ $\delta^2\text{H}$ (‰) | SD | $n\text{-C}_{29}$ $\delta^2\text{H}$ (‰) | SD | $n\text{-C}_{27}$ Conc ( $\mu\text{g g}^{-1}$ ) | SD  | $n\text{-C}_{29}$ Conc ( $\mu\text{g g}^{-1}$ ) | SD  | Average chain length | SD   |
|-------------|------------|------------------------------------------|----|------------------------------------------|----|-------------------------------------------------|-----|-------------------------------------------------|-----|----------------------|------|
| 4/22/10     | 112        | -266                                     | 7  | -269                                     | 8  | 349                                             | 63  | 107                                             | 9   | 27.36                | 0.15 |
| 5/3/10      | 123        | -268                                     | 3  | -270                                     | 2  | 261                                             | 22  | 67                                              | 5   | 27.38                | 0.02 |
| 5/12/10     | 132        | -263                                     | 5  | -261                                     | 6  | 485                                             | 28  | 159                                             | 7   | 27.37                | 0.13 |
| 5/17/10     | 137        | -258                                     | 1  | -246                                     | 2  | 311                                             | 53  | 108                                             | 34  | 27.39                | 0.09 |
| 5/21/10     | 141        | -239                                     | 6  | -227                                     | 10 | 324                                             | 118 | 136                                             | 46  | 27.49                | 0.02 |
| 5/26/10     | 146        | -224                                     | 5  | -211                                     | 5  | 261                                             | 71  | 136                                             | 101 | 27.55                | 0.15 |
| 6/2/10      | 153        | -216                                     | 7  | -210                                     | 3  | 439                                             | 54  | 891                                             | 362 | 28.34                | 0.11 |
| 6/10/10     | 161        | -222                                     | 10 | -223                                     | 4  | 252                                             | 26  | 1282                                            | 391 | 28.69                | 0.12 |
| 6/16/10     | 167        | -216                                     | 6  | -224                                     | 5  | 74                                              | 24  | 1118                                            | 298 | 28.90                | 0.02 |
| 6/28/10     | 179        | -209                                     | 5  | -216                                     | 4  | 115                                             | 20  | 669                                             | 50  | 28.78                | 0.04 |
| 7/14/10     | 195        | -211                                     | 7  | -218                                     | 5  | 96                                              | 26  | 576                                             | 197 | 28.77                | 0.03 |
| 8/4/10      | 216        | -208                                     | 5  | -217                                     | 4  | 123                                             | 24  | 768                                             | 36  | 28.77                | 0.04 |
| 8/27/10     | 239        | -212                                     | 7  | -222                                     | 6  |                                                 |     |                                                 |     |                      |      |
| 9/7/10      | 250        | -209                                     | 10 | -219                                     | 4  | 51                                              | 24  | 492                                             | 142 | 28.82                | 0.06 |
| 10/1/10     | 274        | -215                                     | 7  | -217                                     | 4  | 67                                              | 6   | 534                                             | 40  | 28.77                | 0.05 |
